# Supplementary material for: Shigatoxin encoding Bacteriophage ϕ24B modulates bacterial metabolism to raise antimicrobial tolerance
Source: PubMed Central journal article supplement (PMC5247750; doi:10.1038/srep40424), 2017-01-20
Supplement: srep40424-s1.pdf [file srep40424-s1.pdf]

1  
2  
3  
4  
5  
6  
7  
8  
9  
10  
11  
12  
13  
14  
15  
16  
17  
18  
19  
20  
21  
22  
23  
24  
25  
26  
27  
28  
29  
30  
31  
32  
33  
34  
35  
36  
37  
38  
39  
40  
41  
42  
43  
44  
45  
46

**Shigatoxin encoding Bacteriophage  $\phi$ 24<sub>B</sub> modulates bacterial metabolism to raise antimicrobial tolerance**

Holt, G. S.<sup>1</sup>, Lodge, J.<sup>1</sup>, McCarthy, A. J.<sup>2</sup>, Graham, A.K.<sup>1</sup>, Young, G.<sup>1</sup>, Bridge, S. H.<sup>1</sup>, Brown, A. K.<sup>4</sup>,  
Veses-Garcia, M.<sup>2</sup>, Lanyon, C.V.<sup>1</sup>, Sails, A.<sup>3</sup>, Allison, H. E.<sup>2\*</sup> and Smith, D. L.<sup>1,2†</sup>

<sup>1</sup>Faculty of Health and Life Sciences, Northumbria University, Newcastle upon Tyne, UK

<sup>2</sup>Microbiology Research Group, Institute of Integrative Biology, University of Liverpool, Liverpool, UK

<sup>3</sup>Public Health England, Royal Victoria Hospital, Newcastle upon Tyne, UK

<sup>4</sup>School of Medicine, Pharmacy and Health, Durham University, Durham UK

\*Co-senior authors

† Corresponding author [Darren.smith@northumbria.ac.uk](mailto:Darren.smith@northumbria.ac.uk)

47 **Supplementary Information (SI)**48 **SI Table 1.**

| Cell Growth (single and double lysogen compared to uninfected host) |                          |         |                                   |
|---------------------------------------------------------------------|--------------------------|---------|-----------------------------------|
| Time (h)                                                            | Single or double lysogen | P value | Test type                         |
| 1                                                                   | Φ24 <sub>B</sub> Kan     | <0.001  | Paired T-test (SPSS)              |
|                                                                     | Φ24 <sub>B</sub> KanCat  | <0.001  |                                   |
| 1.5                                                                 | Φ24 <sub>B</sub> Kan     | <0.001  |                                   |
|                                                                     | Φ24 <sub>B</sub> KanCat  | 0.016   |                                   |
| 2.5                                                                 | Φ24 <sub>B</sub> Kan     | <0.001  |                                   |
|                                                                     | Φ24 <sub>B</sub> KanCat  | <0.001  |                                   |
| 3                                                                   | Φ24 <sub>B</sub> Kan     | 0.014   |                                   |
|                                                                     | Φ24 <sub>B</sub> KanCat  | <0.001  |                                   |
| 4                                                                   | Φ24 <sub>B</sub> Kan     | <0.001  |                                   |
|                                                                     | Φ24 <sub>B</sub> KanCat  | <0.001  |                                   |
| 5                                                                   | Φ24 <sub>B</sub> Kan     | <0.001  |                                   |
|                                                                     | Φ24 <sub>B</sub> KanCat  | <0.001  |                                   |
| 6                                                                   | Φ24 <sub>B</sub> Kan     | <0.001  |                                   |
|                                                                     | Φ24 <sub>B</sub> KanCat  | <0.001  |                                   |
| 7                                                                   | Φ24 <sub>B</sub> Kan     | 0.02    |                                   |
|                                                                     | Φ24 <sub>B</sub> KanCat  | <0.001  |                                   |
| SIC                                                                 |                          |         |                                   |
| Condition                                                           | Concentration (μmolar)   | P value | Test type                         |
| 8-Hydroxyquinoline                                                  | 27.6                     | 0.019   | Independent samples T-test (SPSS) |
|                                                                     | 29.3                     | <0.001  |                                   |
|                                                                     | 31                       | <0.001  |                                   |
|                                                                     | 32.72                    | <0.001  |                                   |
|                                                                     | 34.4                     | <0.001  |                                   |
|                                                                     | 36.2                     | <0.001  |                                   |
| Chloroxylenol (4-chlor-3,5-dimethylphenol)                          | 28.7                     | <0.001  |                                   |
|                                                                     | 35.1                     | <0.001  |                                   |
|                                                                     | 41.5                     | 0.023   |                                   |
| Oxolinic acid                                                       | 0.038                    | <0.001  |                                   |
|                                                                     | 0.057                    | <0.001  |                                   |
|                                                                     | 0.077                    | <0.001  |                                   |
|                                                                     | 0.096                    | <0.001  |                                   |
|                                                                     | 0.115                    | <0.001  |                                   |
|                                                                     | 0.134                    | <0.001  |                                   |
| FAPy-adenine                                                        |                          |         |                                   |
| Condition                                                           | Growth phase             | P value | Test type                         |
| 8-Hydroxyquinoline                                                  | Early                    | 0.45    | Paired T-test (SPSS)              |
|                                                                     | Mid                      | 0.93    |                                   |
|                                                                     | Stationary               | <0.001  |                                   |
| Chloroxylenol (4-chlor-3,5-dimethylphenol)                          | Early                    | <0.001  |                                   |
|                                                                     | Mid                      | 0.002   |                                   |
|                                                                     | Stationary               | 0.009   |                                   |
| Pimelic acid                                                        |                          |         |                                   |
| Condition                                                           | Growth phase             | P value | Test type                         |
| 8-Hydroxyquinoline                                                  | Early                    | 0.02    | Paired T-test (SPSS)              |
|                                                                     | Mid                      | N/A     |                                   |
|                                                                     | Stationary               | 0.012   |                                   |
| Chloroxylenol (4-chlor-3,5-dimethylphenol)                          | Early                    | <0.001  |                                   |
|                                                                     | Mid                      | 0.07    |                                   |
|                                                                     | Stationary               | N/A     |                                   |

50

51

52 **SI Table 2.** List of selected parameters where (with white background) the lysogen respired preferentially under  
 53 these selected conditions compared to naïve MC1061. The compounds in the shaded area are those where the naïve  
 54 MC1061 host respired preferentially compared to the lysogen.

| Test                            | Altered use of nutrient source or targeting antimicrobial where a difference was seen between lysogen and naïve MC1061 | Statistical Difference AUC | Statistical difference at mid-exponential growth phase (18h) |
|---------------------------------|------------------------------------------------------------------------------------------------------------------------|----------------------------|--------------------------------------------------------------|
| Uridine 2'-Monophosphate        | P-Source, nucleotide, pyrimidine, uracil, Phosphate                                                                    | P= 0.0094                  | P=0.0173                                                     |
| 8-Hydroxyquinoline              | Chelator lipophilic, RNA synthesis                                                                                     | p=<0.0001                  | p=<0.0001                                                    |
| Chloroxylonol                   | Fungicide                                                                                                              | p=0.0032                   | p=0.0037                                                     |
| Cefoxitin                       | wall, cephalosporin second generation                                                                                  | p=0.015                    | p=0.0361                                                     |
| Puromycin                       | protein synthesis, 30S ribosomal subunit, premature chanin termination                                                 | p=0.0168                   | p=0.154                                                      |
| Niaproof                        | membrane, detergent, anionic                                                                                           | P=0.0192                   | P=0.0132                                                     |
| Geneticin (G418)                | protein synthesis, aminoglycoside                                                                                      | p=0.02                     | p=0.0146                                                     |
| Cefamandole                     | wall, cephalosporin second generation                                                                                  | p=0.0239                   | p=0.1031                                                     |
| Amoxicillin                     | wall, lactam                                                                                                           | p=0.057                    | p=0.0342                                                     |
| Cefmetazole                     | wall, cephalosporin second generation                                                                                  | p=0.08                     | p=0.0026                                                     |
| Methyltrioctylammonium chloride | membrane, detergent, cationic                                                                                          | p=0.08                     | p=0.777                                                      |
| Chlorhexidine                   | membrane, electron transport                                                                                           | p=0.12                     | p=0.14                                                       |
| Ceftriaxone                     | wall, cephalosporin third generation                                                                                   | p=0.14                     | p=0.0791                                                     |
| Phenylarsine oxide              | tyrosine phosphatase inhibitor                                                                                         | p=0.17                     | p=0.2293                                                     |
| Penicillin G                    | wall, lactam                                                                                                           | p=0.25                     | p=0.33                                                       |
| Cefuroxime                      | wall, cephalosporin second generation                                                                                  | P=0.27                     | P=0.0174                                                     |
| Moxalactam                      | wall, lactam                                                                                                           | p=0.59                     | p=0.077                                                      |
| Cefazolin                       | wall, cephalosporin first generation                                                                                   | p=0.61                     | P=0.55                                                       |
|                                 |                                                                                                                        |                            |                                                              |
| β-D-Allose                      | C-Source,carbohydrate,pentose                                                                                          | P=0.0097                   | P=0.0001                                                     |
| Ofloxacin                       | DNA unwinding, gyrase (GN), topoisomerase (GP), fluoroquinolone                                                        | p=0.0048                   | p=0.0008                                                     |
| Oxolinic acid                   | DNA unwinding, gyrase (GN), topoisomerase (GP), quinolone                                                              | P=0.0066                   | P=0.0274                                                     |
| 6% Potassium Chloride           | osmotic sensitivity, KCl                                                                                               | P=0.0631                   | P=0.073                                                      |

|                       |                                                                    |          |          |
|-----------------------|--------------------------------------------------------------------|----------|----------|
| Lomefloxacin          | DNA unwinding, gyrase (GN),<br>topoisomerase (GP), fluoroquinolone | p=0.09   | p=0.09   |
| 5% Potassium Chloride | osmotic sensitivity, KCl                                           | P=0.0939 | P=0.565  |
| 4% NaCl               | osmotic sensitivity, NaCl                                          | p=0.1042 | p=0.134  |
| 3% NaCl               | osmotic sensitivity, NaCl                                          | p=0.1188 | p=0.0699 |
| Sodium salicylate     | anti-capsule, biofilm inhibition, mar<br>inducer                   | p=0.1384 | P=0.055  |
| Ciprofloxacin         | DNA unwinding, gyrase (GN),<br>topoisomerase (GP), fluoroquinolone | p=0.255  | P=0.37   |
| 2% Sodium Lactate     | osmotic sensitivity, sodium lactate                                | p=0.2675 | p=0.0656 |
| 5% NaCl               | osmotic sensitivity, NaCl                                          | p=0.44   | p=0.2456 |
| Sodium metasilicate   | toxic anion                                                        | P=0.7    | p=0.11   |

55  
56  
57  
58  
59  
60  
61  
62  
63  
64  
65  
66  
67  
68  
69  
70  
71  
72  
73  
74  
75  
76  
77  
78  
79

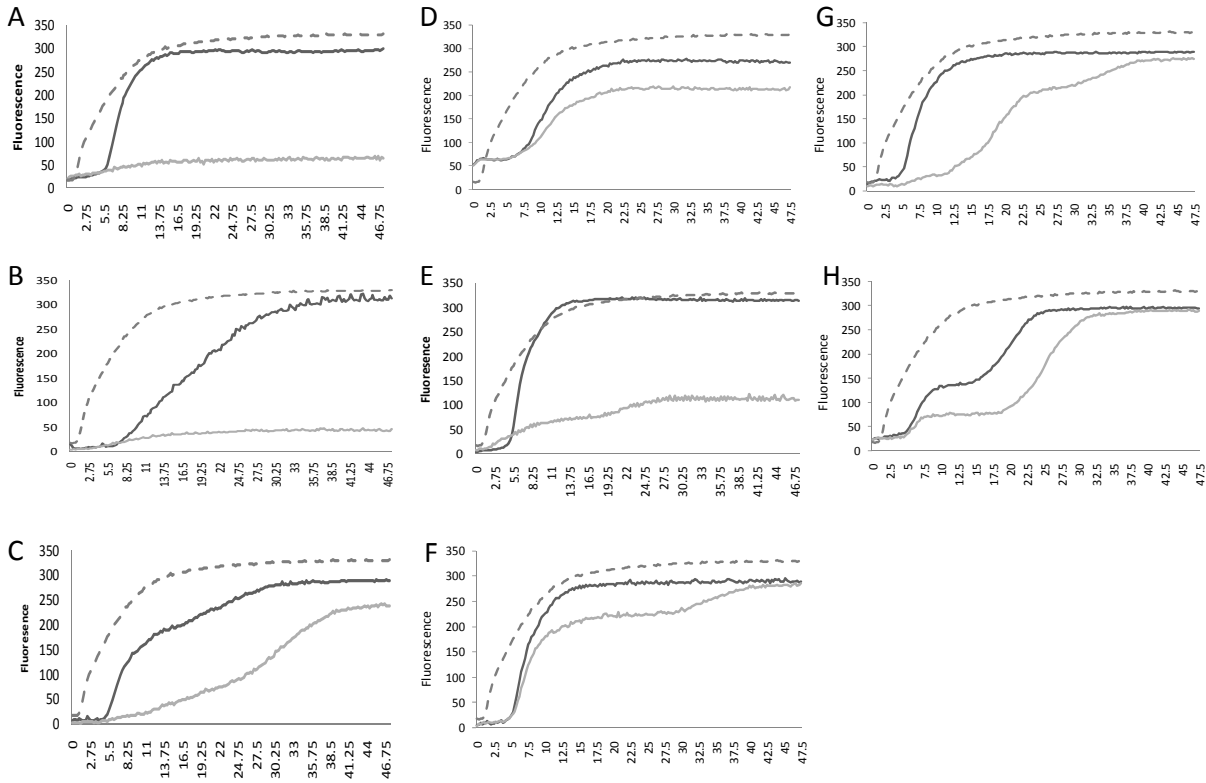

80  
 81 **SI Figure 1** Respiration traces from raw Biolog data comparing naïve MC1061 respiration (light grey line) to lysogen  
 82 (dark grey line), the hashed line represents (n=3) rates of respiration of both naïve MC1061 under standard growth  
 83 conditions in the absence of challenge. Panel **A** illustrates the lysogen’s ability to now utilise a different phosphate  
 84 source for respiration. **B-H** show respiration in the presence of other antimicrobials. Test compounds; **A** - Uridine 2-  
 85 monophosphate; **B** - 8- Hydroxyquinoline; **C** – Chloroxylenol; **D** – Cefoxitin; **E** – Niaproof; **F** – Cefamandole; **G**-  
 86 Amoxicillin; **H** – Cefmetazole. Statistically significant differences using area under the curve can be found in Table 2.

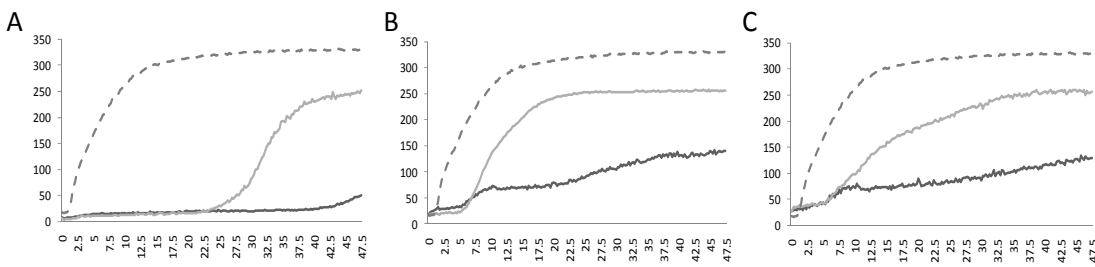

88  
 89 **SI Figure 2** Respiration traces from raw Biolog data comparing naïve MC1061 respiration (light grey line) to lysogen  
 90 (dark grey line), the hashed line represents (n=6) the combine respiration control data of both naïve MC1061 and  
 91 Lysogen. Test compounds; **A** - b-D-Allose; **B** – Ofloxacin; **C** – Oxolinic acid. Statistical values for each of these  
 92 individual graphs can be found in Table 2. These traces show an inverse response when compared to figure 7, where  
 93 conversion by  $\phi 24_{B::Kan}$  has a negative effect on the respiration of MC1061.

Percentage of comparatively significant upregulated compounds between host and lysogen under the duress of chloroxylenol

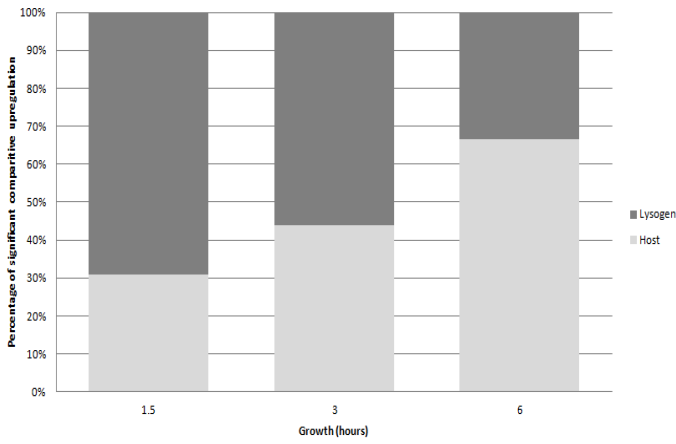

Percentage of comparatively significant upregulated compounds between host and lysogen under the duress of 8-Hydroxyquinilone

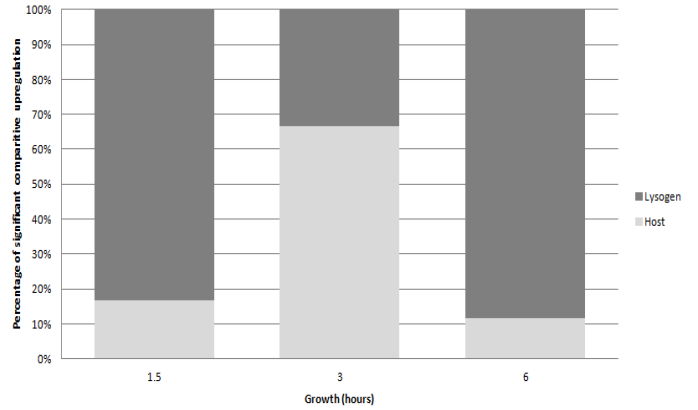

Percentage of comparatively significant upregulated compounds between host and lysogen under normal growth

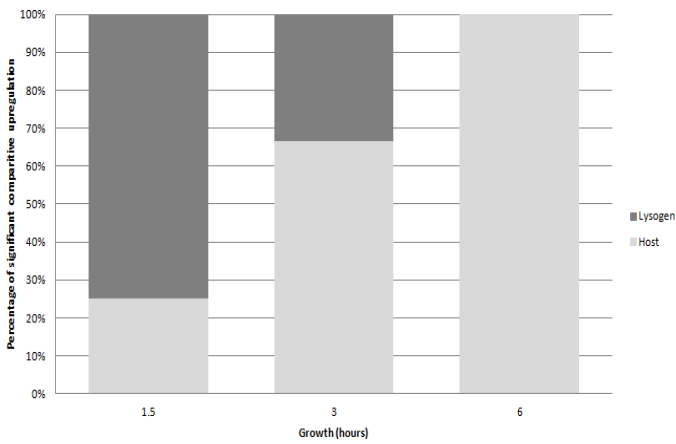

**SI Figure 3** Percentage differences of metabolites present in MC1061 and  $\phi 24_b$ , where incidence is significantly higher ( $P$  value  $<0.05$ ), sampled during growth, under test 8-hydroxyquinoline and chloroxylenol

101 **SI Table 3** Putative metabolite identities and statistics:

| Compound/Retention time/Mz |                   | Putative ID           | mass error ppm | Fragment peak matches | No. of fragments matching top 5 reference fragments | Adduct of compound | Formula of compound | isotope similarity | Anova (P)  | Max Fold Change | Upregulated |
|----------------------------|-------------------|-----------------------|----------------|-----------------------|-----------------------------------------------------|--------------------|---------------------|--------------------|------------|-----------------|-------------|
| 1                          | 1.71_217.8647m/z  | N/A                   | N/A            | N/A                   | N/A                                                 | N/A                | N/A                 | N/A                | 0.00163439 | 1.191           | Host        |
| 2                          | 9.37_173.0806m/z  | 2-PROpylglutanic acid | -7.5           | 7                     | 0                                                   | M-H                | C8H14O4             | 95.03              | 0.00063323 | 1.452           | Phage       |
| 3                          | 11.62_742.1533n   | N/A                   | N/A            | N/A                   | N/A                                                 | N/A                | N/A                 | N/A                | 0.03458018 | 1.364           | Phage       |
| 4                          | 11.80_293.1760m/z | Myrsinone             | 0.59           | 6                     | 2                                                   | M-H                | C17H26O4            | 95.9               | 0.00002419 | 1.201           | Phage       |
| 5                          | 12.83_384.1933n   | ARMI                  | -1.1           | 10                    | 4                                                   | M+NA or M+K or M+H | C23H28O5            | 93.42              | 0.00000001 | 1.892           | Host        |
| 6                          | 10.12_273.1951n   | HEPTAN                | 3.82           | 5                     | 0                                                   | M+H or M+Na        | C14H27NO4           | 96.95              | 0.00056996 | 1.182           | Phage       |
| 7                          | 10.51_287.2924n   | N/A                   | N/A            | N/A                   | N/A                                                 | N/A                | N/A                 | N/A                | 0.00008937 | 1.230           | Phage       |
| 8                          | 11.13_772.3460n   | N/A                   | N/A            | N/A                   | N/A                                                 | N/A                | N/A                 | N/A                | 0.00005400 | 1.253           | Phage       |
| 9                          | 6.62_192.1364n    | N/A                   | N/A            | N/A                   | N/A                                                 | N/A                | N/A                 | N/A                | 0.00000048 | 1.341           | Phage       |
| 10                         | 9.71_176.1808n    | CANAV                 | 510            | 0                     | 0                                                   | M+Na or M+K        | C5H12N4O3           | 95.5               | 0.00010806 | 1.639           | Host        |
| 11                         | 1.85_161.0810m/z  | Ethyl                 | 1.28           | 4                     | 0                                                   | M+H                | C7H12O4             | 91.78              | 0.00120174 | 1.161           | Phage       |
| 12                         | 11.96_420.3836m/z | EUROCOYL              | -0.1           | 3                     | 2                                                   | M+ACN+H            | C25H46O2            | 95.49              | 0.00000010 | 1.428           | Phage       |

|    |                   |                                                                                      |      |     |     |                          |               |       |            |       |       |
|----|-------------------|--------------------------------------------------------------------------------------|------|-----|-----|--------------------------|---------------|-------|------------|-------|-------|
| 13 | 2.14_220.1546m/z  | MIGLUSTAT                                                                            | 1.1  | 12  | 3   | M+H                      | C10H21NO4     | 31.1  | 0.00007761 | 1.136 | Host  |
| 14 | 8.93_277.1291m/z  | Pentoxifylline                                                                       | -5.4 | 1   | 0   | M-H                      | C13H18N4O3    | 88.77 | 0.03615228 | 1.074 | Host  |
| 15 | 6.00_174.0396m/z  | FAPy-Adenine                                                                         | -1   | 2   | 0   | M+Na-2H                  | C5H7N5O       | 80.57 | 0.00190075 | 1.426 | Host  |
| 16 | 12.17_381.0798n   | 4-[[[(2,6-dichlorophenyl)carbonyl]amino]-N-piperidin-4-yl]-1H-pyrazole-3-carboxamide | 10.3 | 3   | 1   | M+H or<br>M+Na or<br>M+K | C16H17Cl2N5O2 | 90.83 | 0.02445850 | 1.060 | Phage |
| 5  | 12.83_384.1933n   | ARM                                                                                  | -1   | 10  | 4   | M+NA or<br>M+K or<br>M+H | C23H28O5      | 93.52 | 0.00672773 | 1.280 | Host  |
| 17 | 11.93_252.1728n   | Epioxylubimin                                                                        | 1.05 | 25  | 2   | M+H OR<br>M+Na           | C15H24O3      | 93.23 | 0.00453567 | 1.142 | Host  |
| 18 | 11.79_295.1910m/z | 9-DECENO                                                                             | 0.62 | 5   | 0   | M+K                      | C15H30NO2     | 96.92 | 0.01428060 | 1.091 | Phage |
| 18 | 11.79_295.1910m/z | Gingerol                                                                             | 1.99 | 10  | 3   | M+H                      | C17H26O4      | 96.92 |            |       |       |
| 19 | 11.95_233.1540m/z | Turmeronol B                                                                         | 1.53 | 9   | 2   | M+H                      | C15H20O2      | 75.12 | 0.00010829 | 1.779 | Host  |
| 19 | 11.95_233.1540m/z | 1,3,11(13)-EUD                                                                       | 1.53 | 9   | 1   | M+H                      | C15H20O2      | 75.12 |            |       |       |
| 20 | 6.11_192.0995m/z  | Epsilon-heptenoic acid                                                               | 0.17 | 3   | 0   | M+ACN+Na                 | C7H12O2       | 92.2  | 0.04028174 | 1.084 | Phage |
| 12 | 11.97_420.3837m/z | Erucoylacetone                                                                       | 0.2  | 3   | 2   | M+ACN+H                  | C25H46O2      | 95.73 | 0.00991001 | 1.259 | Phage |
| 21 | 11.12_370.0693m/z | Citbrasin                                                                            | 1.6  | 8   | 3   | M+K                      | C17H17NO6     | 95.32 | 0.00070557 | 1.109 | Phage |
| 22 | 10.25_272.2594m/z | hexadecanoic acid                                                                    | 3.53 | 16  | 4   | M+H                      | C16H33NO2     | 94.86 | 0.01076165 | 1.080 | Phage |
| 23 | 9.63_286.1762m/z  | N/A                                                                                  | N/A  | N/A | N/A | N/A                      | N/A           | N/A   | 0.00031671 | 2.413 | Host  |



|                         |                   |                                           |      |     |     |                        |             |       |            |       |       |
|-------------------------|-------------------|-------------------------------------------|------|-----|-----|------------------------|-------------|-------|------------|-------|-------|
| 24                      | 7.61_311.1832m/z  | n5-Pan                                    | -38  | 0   | 0   | M+Na                   | C14H28N2O4  | 84.31 | 0.00069227 | 2.311 | Host  |
| 25                      | 11.12_368.0724m/z | Alpha-Methylene Adenosine Monophosphate   | -1.9 | 7   | 2   | M+Na                   | C11H16N5O6P | 95.36 | 0.00056106 | 1.090 | Phage |
| 26                      | 10.78_286.2846m/z | N/A                                       | N/A  | N/A | N/A | N/A                    | N/A         | N/A   | 0.01460937 | 1.164 | Phage |
| 27                      | 10.68_288.2895m/z | Sphinganine                               | -0.6 | 15  | 5   | M+H                    | C17H37NO2   | 97.63 | 0.00441829 | 1.135 | Phage |
| 2A                      | 8.37_174.0879n    | Ethyladipic acid or 2-Propylglutaric acid | -7.7 | 8   | 1   | M-H, or M+Na-2H        | C8H14O4     | 95.79 | 0.00478386 | 1.847 | Host  |
| 28                      | 10.79_278.9872m/z | 2-Keto-3-deoxy-6-phosphogluconic acid     | -6.1 | 8   | 1   | M+Na-2H                | C6H11O9P    | 92.2  | 0.02553743 | 1.086 | Host  |
| 28 (2 <sup>nd</sup> ID) | 10.79_278.9872m/z | ETHOXZ                                    | -3   | 2   | 0   | M+Na-2H                | C9H10N2O3S2 | 81.06 |            |       |       |
| 29                      | 10.93_256.9850m/z | 6-phosphono                               | -85  | 5   | 0   | M-H                    | C6H11O9P    | 94.62 | 0.03357850 | 1.084 | Host  |
| 30                      | 11.17_346.9947m/z | 2-(ALPHA                                  | -126 | 5   | 0   | M-H                    | C9H17O12P   | 88.02 | 0.01381940 | 1.101 | Host  |
| 31                      | 9.88_378.1772m/z  | 3,3-DIMETHYL                              | 93.2 | 2   | 0   | M-H                    | C16H21N5O6  | 88.13 | 0.00000000 | 1.621 | Phage |
| 32                      | 2.82_236.0782m/z  | 8-[(Amino                                 | -1   | 3   | 0   | M-H                    | C9H19NO2S2  | 85.57 | 0.00000008 | 1.591 | Host  |
| 32                      | 2.82_236.0782m/z  | N-(1-Deoxy-1-fructosyl)glycine            | 2.69 | 5   | 0   | M-H                    | C8H15NO7    | 94.85 |            |       |       |
| 33                      | 5.28_309.1189m/z  | Imazam                                    | -11  | 1   | 0   | M+Na-2H                | C16H20N2O3  | 86.45 | 0.03600555 | 1.390 | Phage |
| 33                      | 5.28_309.1189m/z  | Desloratad                                | 8.12 | 0   | 0   | M-H                    | C19H19ClN2  | 63.92 |            |       |       |
| 34                      | 1.42_257.0776m/z  | Imidazoleacetic acid riboside             | -1.2 | 7   | 1   | M-H                    | C10H14N2O6  | 94.13 | 0.03095166 | 1.094 | Host  |
| 35                      | 1.93_212.9722n    | 2 AMINO or L ASPARTYL                     | -149 | 0   | 0   | M+H or M+ACN+H or M+Na | C4H8NO7P    | 94.5  | 0.00477583 | 1.119 | Host  |

|    |                   |                                                                                        |      |     |     |                |               |       |            |       |       |
|----|-------------------|----------------------------------------------------------------------------------------|------|-----|-----|----------------|---------------|-------|------------|-------|-------|
| 36 | 10.32_268.1505n   | Isoleucyl-Histodine or Histidinyl-isoleucine or Histidinyl-Leucine or Leucyl-Histodine | -12  | 7   | 0   | M+H or M+Na    | C12H20N4O3    | 92.25 | 0.00000002 | 1.607 | Phage |
| 37 | 1.83_259.0926m/z  | 5-Methyluridine                                                                        | 0.45 | 7   | 2   | M+H            | C10H14N2O6    | 96.5  | 0.04657029 | 1.058 | Host  |
| 38 | 9.29_251.1647m/z  | 1HYDROXY                                                                               | 2.19 | 7   | 0   | M+H            | C15H22O3      | 95.8  | 0.00000007 | 1.618 | Phage |
| 39 | 13.36_1020.0887n  | N/A                                                                                    | N/A  | N/A | N/A | N/A            | N/A           | N/A   | 0.00020510 | 1.252 | Phage |
| 40 | 9.13_514.2625n    | GLYCINO                                                                                | 11.3 | 2   | 1   | M-H or M+Na-2H | C29H38O8      | 84.79 | 0.00259487 | 1.122 | Phage |
| 41 | 13.52_297.1529m/z | GRAVEL                                                                                 | 11   | 4   | 1   | M-H            | C19H22O3      | 94.99 | 0.00674144 | 1.263 | Host  |
| 42 | 11.96_565.0481m/z | URIDINE                                                                                | 0.59 | 7   | 0   | M-H            | C15H24N2O17P2 | 83.68 | 0.01779212 | 1.070 | Phage |
| 43 | 12.68_733.0280m/z | N/A                                                                                    | N/A  | N/A | N/A | N/A            | N/A           | N/A   | 0.00924811 | 1.111 | Phage |
| 44 | 2.50_175.1443m/z  | N-Dimethyl-lysine                                                                      | 1.08 | 6   | 0   | M+H            | C8H18N2O2     | 97.67 | 0.03036812 | 1.572 | Phage |
| 45 | 1.98_186.0128n    | 3-PHOSPHO                                                                              | 107  | 4   | 0   | M-H or M+Na-2H | C3H7O7P       | 97.91 | 0.00021209 | 1.152 | Host  |
| 4  | 11.82_293.1760m/z | Myrsinone                                                                              | 0.71 | 6   | 2   | M-H            | C17H26O4      | 95.65 | 0.03289389 | 1.068 | Host  |
| 46 | 10.85_179.1065m/z | 3 POSS ID'S                                                                            | 147  | 0   | 0   | M-H            | C6H14NO5      | 92.2  | 0.03020868 | 1.118 | Host  |
| 47 | 5.93_252.1575n    | 2-(2-[2-[2-(2-Methoxy-Ethoxy)-Ethoxy]-Ethoxy]-Ethoxy)-Ethanol                          | 0.86 | 5   | 0   | M+H or M+Na    | C11H24O6      | 92.56 | 0.03127143 | 1.085 | Host  |
| 48 | 8.16_286.1652m/z  | POLYETHYLENE                                                                           | 1.3  | 8   | 1   | M+ACN+H        | C12H20O5      | 88.26 | 0.00000068 | 1.304 | Phage |
| 49 | 7.75_203.1280m/z  | SEBACIC ACID                                                                           | 1.31 | 5   | 0   | M+H            | C10H18O4      | 88.75 | 0.00001700 | 1.226 | Phage |
| 50 | 4.72_1100.3683n   | N/A                                                                                    | N/A  | N/A | N/A | N/A            | N/A           | N/A   | 0.00000026 | 1.560 | Phage |

|    |                   |                                                                         |      |     |     |                          |                  |       |            |       |       |
|----|-------------------|-------------------------------------------------------------------------|------|-----|-----|--------------------------|------------------|-------|------------|-------|-------|
| 51 | 9.47_454.2408n    | Ethyl Cellulose                                                         | -1.3 | 4   | 0   | M-H or<br>M+Na-2H        | C20H38O11        | 92.02 | 0.00000026 | 1.560 | Phage |
| 39 | 13.36_1020.0885n  | N/A                                                                     | N/A  | N/A | N/A | N/A                      | N/A              | N/A   | 0.01735946 | 1.051 | Phage |
| 52 | 1.42_365.0428n    | N/A                                                                     | N/A  | N/A | N/A | N/A                      | N/A              | N/A   | 0.02345941 | 1.118 | Host  |
| 53 | 7.71_209.0445m/z  | 3-(3,4-Dihydroxy-5-methoxy)-2-propenoic acid                            | -4.9 | 2   | 0   | M-H                      | C10H10O5         | 95.49 | 0.00007118 | 1.223 | Phage |
| 54 | 10.64_264.9911m/z | RU78299                                                                 | 11.4 | 5   | 1   | M+Na-2H                  | C9H9O6P          | 87.27 | 0.03671033 | 1.144 | Phage |
| 55 | 11.05_253.1440m/z | GALACTO                                                                 | 201  | 2   | 0   | M-H                      | C9H18O8          | 97.51 | 0.02875719 | 1.052 | Host  |
| 56 | 6.45_259.1184m/z  | Glycerol tripropanoate                                                  | -1   | 0   | 0   | M-H                      | C12H20O6         | 90.27 | 0.00794597 | 1.089 | Host  |
| 15 | 5.96_174.0395m/z  | Diureido-Acetate                                                        | 0.43 | 0   | 0   | M-H                      | C4H7N4O4         | 81    | 0.00000763 | 2.459 | Phage |
| 57 | 9.34_328.1765m/z  | N/A                                                                     | N/A  | N/A | N/A | N/A                      | N/A              | N/A   | 0.00000854 | 1.634 | Phage |
| 58 | 1.42_459.9496m/z  | POLYTHIAZIDE                                                            | 9.18 | 3   | 0   | M+Na-2H                  | C11H13CIF3N3O4S3 | 58.45 | 0.00007997 | 2.680 | Phage |
| 59 | 9.67_297.1586n    | 3-[[4-AMINO-1-TERT-BUTYL-1H-PYRAZOLO[3,4-D]PYRIMIDIN-3-YL)METHYL]PHENOL | -1.4 | 5   | 0   | M+H or<br>M+Na           | C16H19N5O        | 92.81 | 0.00000037 | 1.913 | Phage |
| 60 | 9.89_242.1505n    | N/A                                                                     | N/A  | N/A | N/A | N/A                      | N/A              | N/A   | 0.00000754 | 1.899 | Phage |
| 61 | 1.43_289.1277n    | Ophthalmic acid                                                         | 1.31 | 7   | 0   | M+H or<br>M+Na or<br>M+K | C11H19N3O6       | 95.35 | 0.00000120 | 1.327 | Phage |
| 38 | 9.77_251.1649m/z  | N1-ACTEYL-103.12                                                        |      | 0   | 0   | M+ACN+Na                 | C9H21N3O         | 97.4  | 0.00003191 | 2.204 | Phage |
| 62 | 9.29_402.2860m/z  | Sphingofungin F                                                         | 2.62 | 5   | 0   | M+H                      | C21H39NO6        | 88.38 | 0.00004939 | 2.350 | Phage |
| 63 | 4.45_843.2912m/z  | 3-Sialyl Lewis                                                          | 6.57 | 14  | 2   | M+Na                     | C31H52N2O23      | 94.34 | 0.04643126 | 1.100 | Phage |

|     |                   |                                                                          |      |     |     |         |               |       |            |       |       |
|-----|-------------------|--------------------------------------------------------------------------|------|-----|-----|---------|---------------|-------|------------|-------|-------|
| 64  | 9.71_269.1755m/z  | Capryloylcholine                                                         | 1.4  | 5   | 2   | M+K     | C13H28NO2     | 96.32 | 0.00001729 | 2.086 | Phage |
| S1  | 10.26_411.1987m/z | icariside B8                                                             | -0.5 | 11  | 1   | M+Na    | C19H32O8      | 84.89 | 0.03032644 | 1.157 | Host  |
| S2  | 10.26_277.1407m/z | 1-[(2-Amino-6,9-Dihydro-1h-Purin-6-Yl)Oxy]-3-Methyl-2-Butanol            | -0   | 2   | 0   | M+ACN+H | C10H13N5O2    | 91.1  | 0.02763331 | 1.171 | Phage |
| S3  | 9.65_389.1827m/z  | (-)-11-hydroxy-9,10-dihydrojasmonic acid 11-beta-D-glucoside             | 2.58 | 4   | 0   | M-H     | C18H30O9      | 83.64 | 0.04213067 | 1.095 | Phage |
| S4  | 10.68_207.1020m/z | tuberonic acid or 12-hydroxyjasmonic acid or epi-4'-hydroxyjasmonic acid | -2.9 | 8   | 0   | M-H2O-H | C12H18O4      | 94.4  | 0.02510448 | 1.105 | Phage |
| S5  | 10.47_240.1956m/z | RISHITIN                                                                 | -1   | 27  | 1   | M+NH4   | C14H22O2      | 93.93 | 0.03927680 | 1.804 | Phage |
| S6  | 11.29_223.1005m/z | 1-METHYL-6-PHENYL-1h-IMIDAZOL[4,5-B]PYRIDIN-2-AMINE                      | 7.26 | 0   | 0   | M-H     | C13H12N4      | 86.21 | 0.02797408 | 1.113 | Host  |
| S7  | 1.29_348.8967m/z  | N/A                                                                      | N/A  | N/A | N/A | N/A     | N/A           | N/A   | 0.04022452 | 1.273 | Host  |
| S8  | 1.37_178.1075m/z  | Pimelic acid                                                             | 0.56 | 8   | 2   | M+NH4   | C7H12O4       | 67.66 | 0.02768047 | 1.291 | Host  |
| S9  | 1.35_164.0919m/z  | 3-DEOXY-d-GLUCOSAMINE                                                    | 0.82 | 14  | 0   | M+H     | C6H13NO4      | 88.26 | 0.03943001 | 1.385 | Host  |
| S10 | 11.63_467.0141m/z | deoxyuridine triphosphate                                                | 102  | 0   | 0   | M-H     | C9H15N2O14P3  | 88.23 | 0.01819624 | 1.072 | Host  |
| S11 | 11.65_473.0048m/z | ALLURA RED AC                                                            | -10  | 6   | 1   | M+Na-2H | C18H16N2O8S2  | 75.97 | 0.00211876 | 1.078 | Host  |
| S12 | 12.24_555.0084m/z | N/A                                                                      | N/A  | N/A | N/A | N/A     | N/A           | N/A   | 0.00358126 | 1.082 | Host  |
| S13 | 11.45_455.0141m/z | HALOSULFURON-METHYL                                                      | -3.9 | 2   | 0   | M+Na-2H | C13H15ClN6O7S | 63.46 | 0.01500173 | 1.064 | Host  |
| S14 | 10.44_252.9904m/z | RU78300                                                                  | 8.8  | 8   | 0   | M+Na-2H | C8H9O6P       | 90.34 | 0.02427095 | 1.077 | Host  |

|     |                   |                                             |      |     |     |     |            |       |            |       |      |
|-----|-------------------|---------------------------------------------|------|-----|-----|-----|------------|-------|------------|-------|------|
| S15 | 10.58_341.0050m/z | 1,6-Di-O-Phosphono-D-Allitol (or -mannitol) | 1.73 | 2   | 0   | M-H | C6H16O12P2 | 94.13 | 0.00830116 | 1.079 | Host |
| S16 | 11.43_469.0292m/z | N/A                                         | N/A  | N/A | N/A | N/A | N/A        | N/A   | 0.00229216 | 1.091 | Host |

102

103

104

105

106

Table details the 80 metabolites that have been deemed significant using CV percentage, chromatogram peaks, statistical analysis and confirmed using MS-MS and fragmentation analysis under antimicrobial challenge of MC1061 and Lysogen. The 16 metabolites (S1-S16) determined to be different metabolites that discriminate between MC1061 and Lysogen under standard laboratory growth conditions. Table lists retention times and Mz from the column. It also includes putative compound ID based from comparison searches against pre-determined databases. It also determines fragment scores of MS-MS and the level of change in abundance whether associated with MC1061 (host) or the Lysogen (phage).

107

108

109

110

111

112

113

114

115

116

117

118

119

120

121

122

123

124

125 **SI Table 4.** Statistics for compound ID's (sustained with reputable MSMS fragmentation) related to known bacterial pathways

| m/z           | ID                | Mass error (ppm) | Adduct                   | Formula    | Anova (p) | Max Fold Change | Up regulated |
|---------------|-------------------|------------------|--------------------------|------------|-----------|-----------------|--------------|
| 174.0396      | FAPy-Adenine      | 0.69             | M-H                      | C4H7N4O4   | 0.0019    | 1.43            | Naïve Host   |
| 272.2594      | hexadecanoic acid | 3.53             | M+H                      | C16H33NO2  | 0.01      | 1.08            | Lysogen      |
| 288.2895      | Sphinganine       | -0.64            | M+H                      | C17H37NO2  | 0.0044    | 1.13            | Lysogen      |
| 259.0926      | 5-Methyluridine   | 0.45             | M+H                      | C10H14N2O6 | 0.0466    | 1.06            | Naïve Host   |
| 289.1277<br>n | Ophthalmic acid   | 1.31             | M+H or<br>M+Na<br>or M+K | C11H19N3O6 | 0.0000012 | 1.33            | Lysogen      |
| 178.1075      | Pimelic acid      | 0.56             | M+NH4                    | C7H12O4    | 0.0277    | 1.29            | Lysogen      |

126  
127  
128  
129  
130  
131  
132  
133  
134

**SI Table 5.** PLS-DA statistics

| PLS-DA Standard conditions           |            |          |        |         |
|--------------------------------------|------------|----------|--------|---------|
| Component                            | Eigenvalue | R2Y(cum) | Q2     | Q2(cum) |
| 1                                    | 10.6       | 0.262    | -0.556 | -0.1    |
| 2                                    | 4.06       | 0.847    | 0.755  | 0.73    |
| PLS-DA chloroxylenol conditions      |            |          |        |         |
| Component                            | Eigenvalue | R2Y(cum) | Q2     | Q2(cum) |
| 1                                    | 4          | 0.923    | 0.802  | 0.802   |
| 2                                    | 2.71       | 0.981    | 0.405  | 0.882   |
| PLS-DA 8-hydroxyquinoline conditions |            |          |        |         |
| Component                            | Eigenvalue | R2Y(cum) | Q2     | Q2(cum) |
| 1                                    | 3.84       | 0.89     | 0.74   | 0.74    |
| 2                                    | 3.75       | 0.967    | 0.533  | 0.879   |

## Supplementary Information (SI) - Methods

### Bacterial phenotypic microarray

The panel plates used for this study included Biolog plates PM 1-20, which include a plethora of both metabolic and toxicological effectors. The various plates test: PM 1, 2a-Respiration and metabolism of different carbon sources; PM3B - respiration on different Nitrogen sources; PM4A -utilisation of different phosphorous and sulphur sources; PM5 - utilisation of other nutrient supplements including amino acids; PM 6,7,8 i- utilisation of a range of peptide Nitrogen sources; PM 9 –impact of osmolytes on respiration; PM10 - effect of pH on respiration; PM11C, 12B, 13B, 14A, 15B, 16A, 17A, 18C, 19 and 20B – respiration impacted by a wide range of chemical compounds including antibiotics.
